# Supplementary material for: Crosstalk between β-Catenin and CCL2 Drives Migration of Monocytes towards Glioblastoma Cells
Source: Int J Mol Sci. 2022 Apr 20;23(9):4562. doi: 10.3390/ijms23094562 (PMC9101913; doi:10.3390/ijms23094562)
Supplement: Supplementary file 1 [file ijms-23-04562-s001.zip › ijms-1658045-supplementary.pdf]

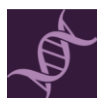

Supplementary figures:

# Crosstalk between $\beta$ -catenin and CCL2 drives migration of monocytes towards glioblastoma cells

Philippe Aretz, Donata Maciaczyk, Suad Yusuf, Rüdiger V. Sorg, Daniel Hänggi, Hongjia Liu, Hongde Liu, Tikam Chand Dakal, Amit Sharma, Ramakrishna Bethanabatl, Silke Neumann, Jarek Maciaczyk

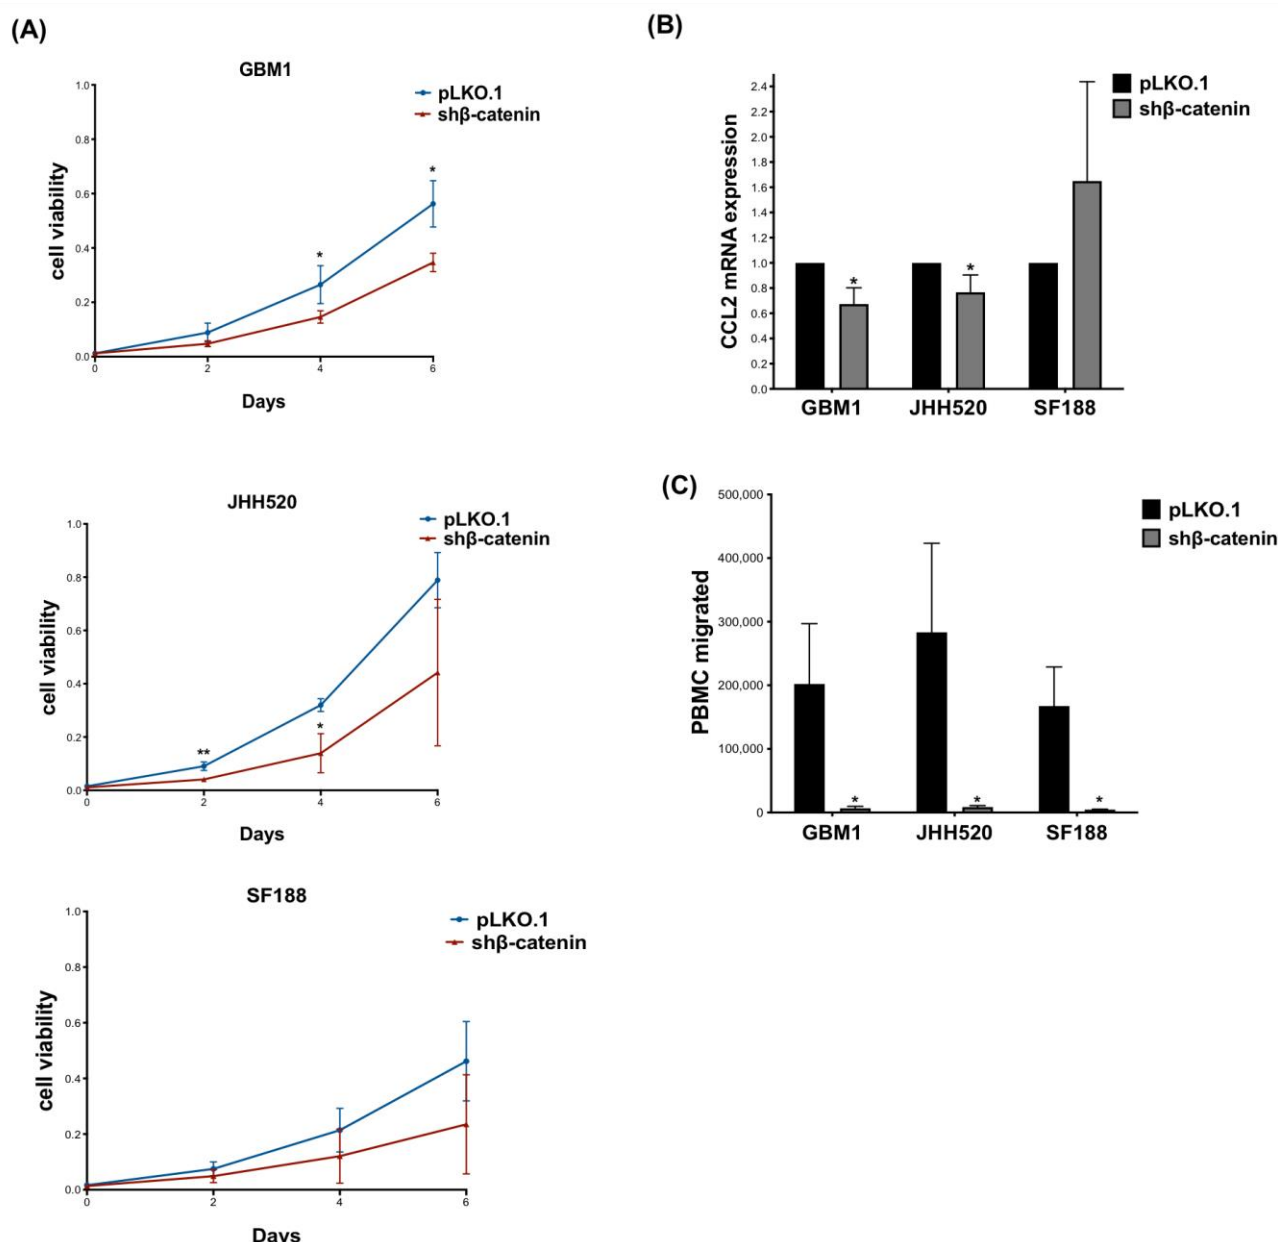

**Supplementary Figure S1:  $\beta$ -catenin knockdown partially decreases cell viability and CCL2 mRNA expression in GBM cells.**

GBM cell lines (GBM1, JHH520, SF188) were transduced with lentiviral particles containing sh $\beta$ -catenin plasmids: (A) Cell viability was partially reduced compared to control (pLKO.1) cells. Exponential growth curves were calculated for each condition. (B) The relative CCL2 mRNA expression levels were analysed by RT-qPCR in sh $\beta$ -catenin cells and compared to controls (pLKO.1). (C) PBMC migration towards TCM of sh $\beta$ -catenin GBM cells was significantly decreased compared to control (pLKO.1). Data are presented as mean  $\pm$  SD (n=3). Statistical significance was calculated with unpaired t-test. \*  $p \leq 0.05$  \*\*  $p \leq 0.01$  \*\*\*  $p \leq 0.001$ .

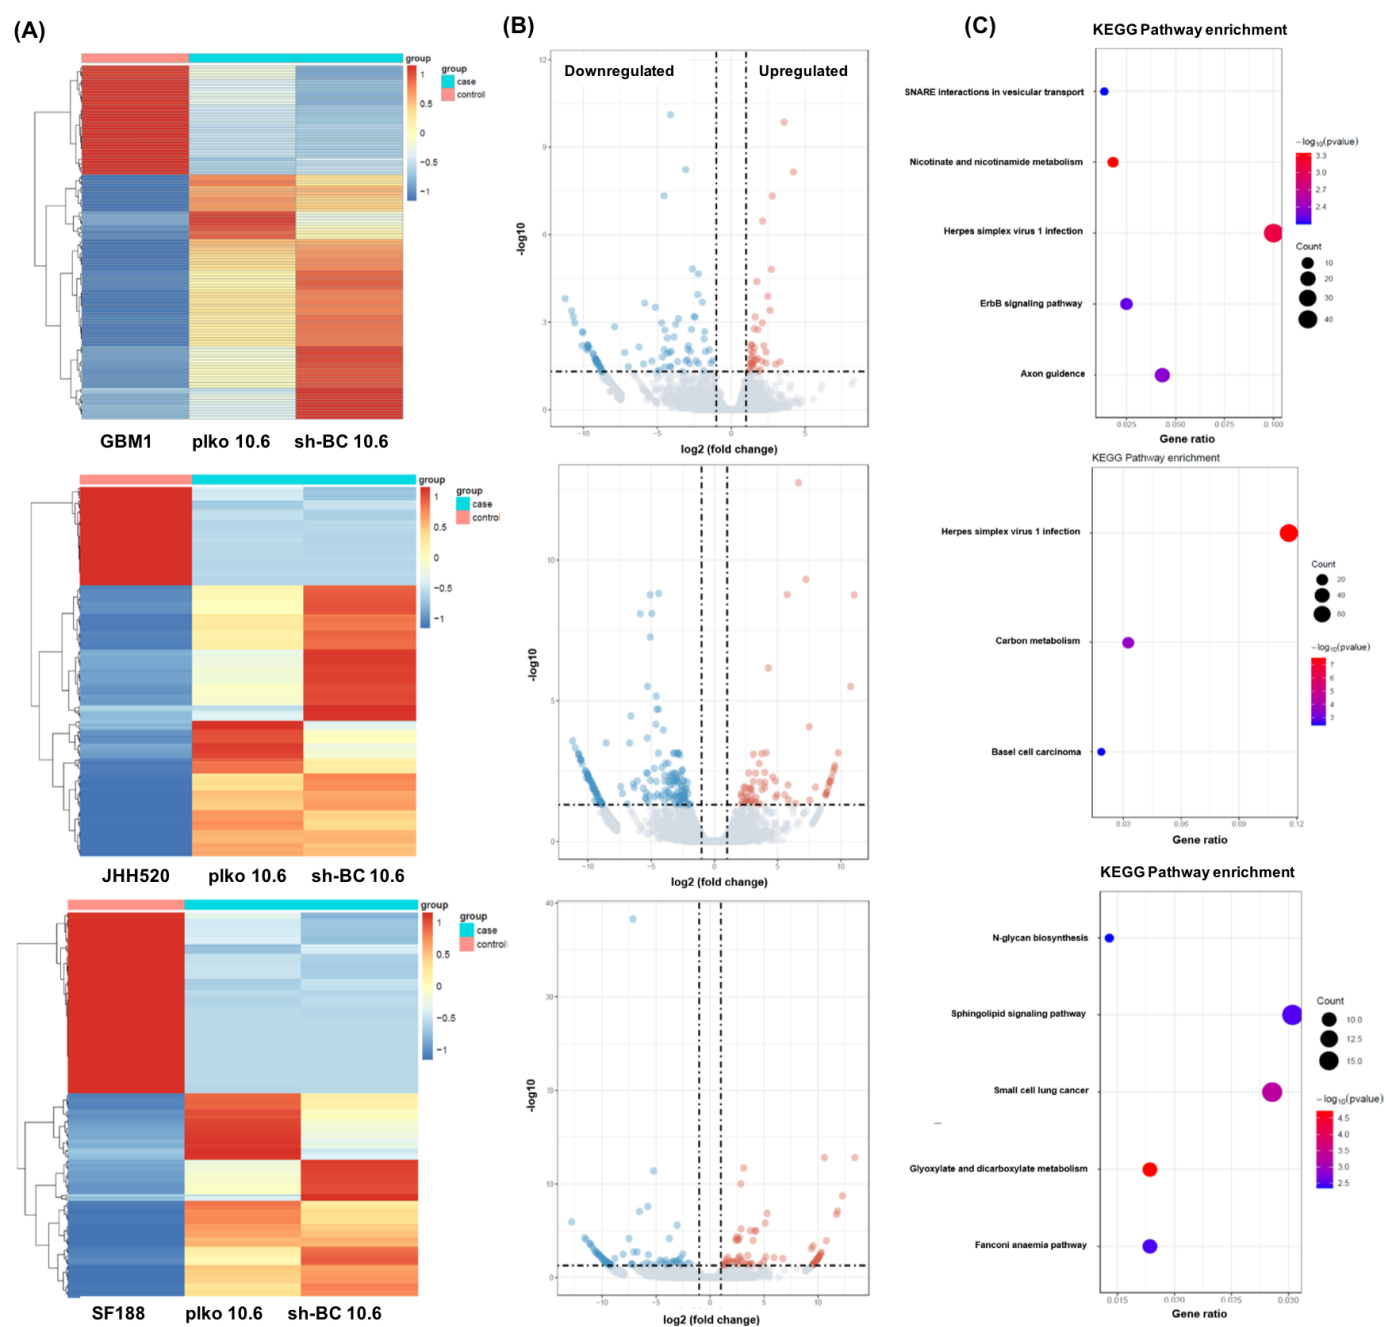

**Supplementary Figure S2:** Genome-wide gene expression analysis of three GBM cell lines: **(A)** heatmap showing variation of gene expression in control (pLKO.1) cells and sh $\beta$ -catenin cells, **(B)** altered genes compared to the control cells (pLKO.1), **(C)** KEGG associated pathways.

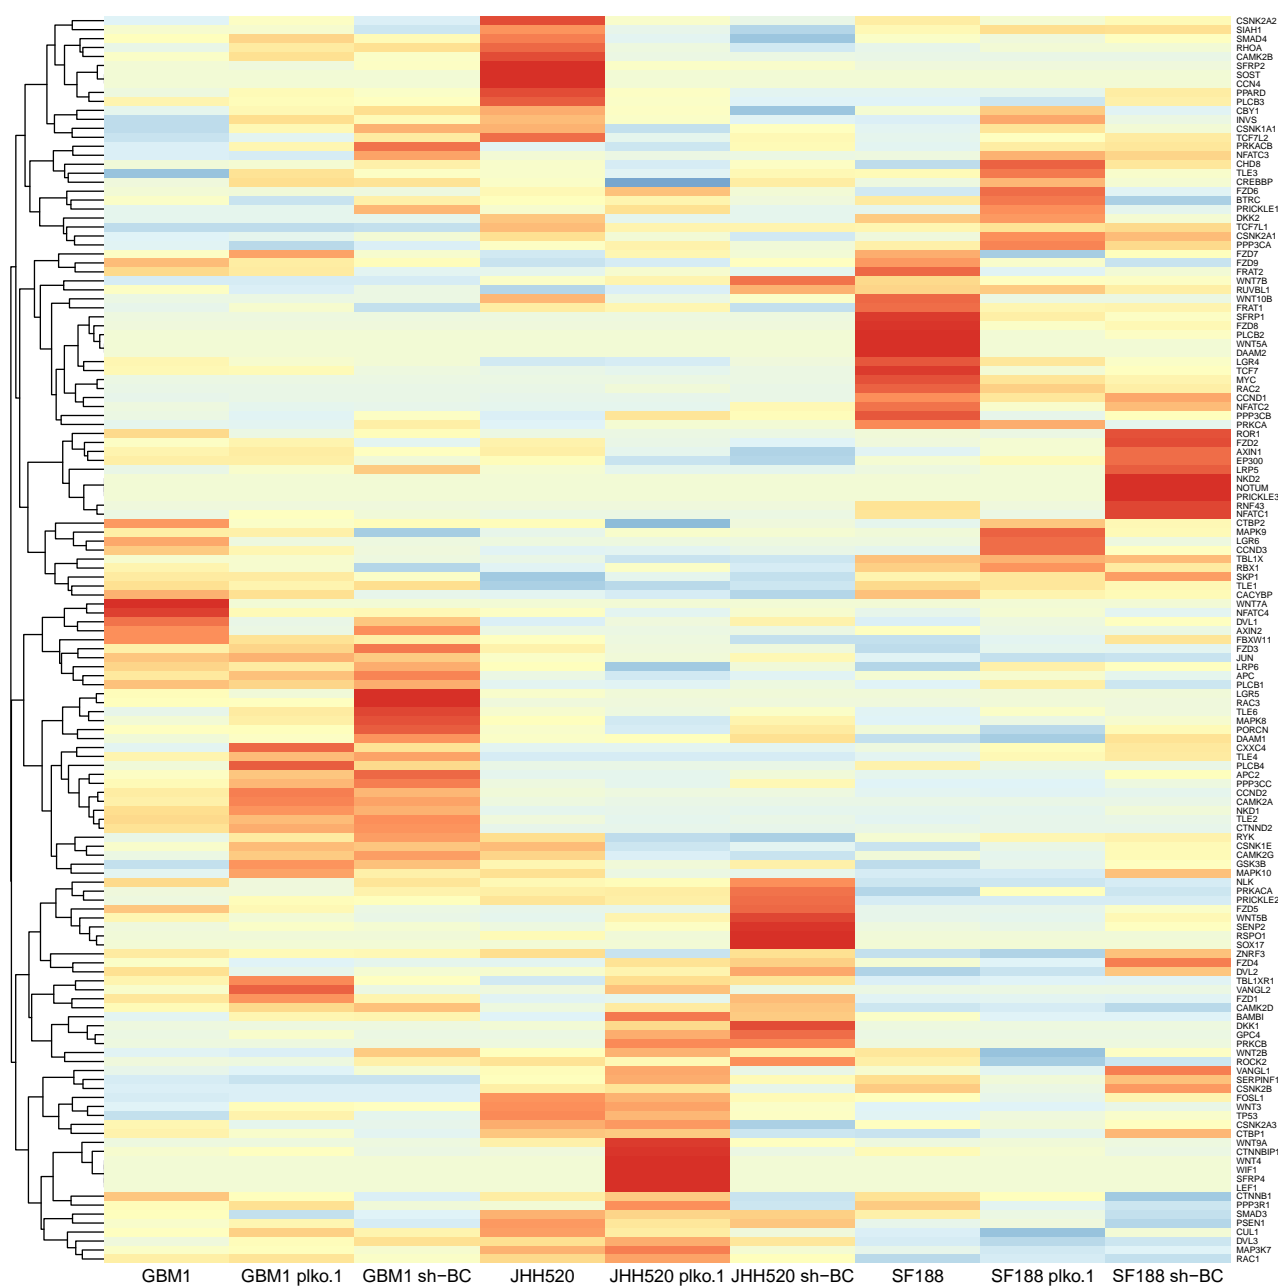

**Supplementary Figure S3:** A heat map shows changes in expression of genes involved in the Wnt/β-catenin pathway in three cell lines, control (pLKO.1) cells and shβ-catenin cells.

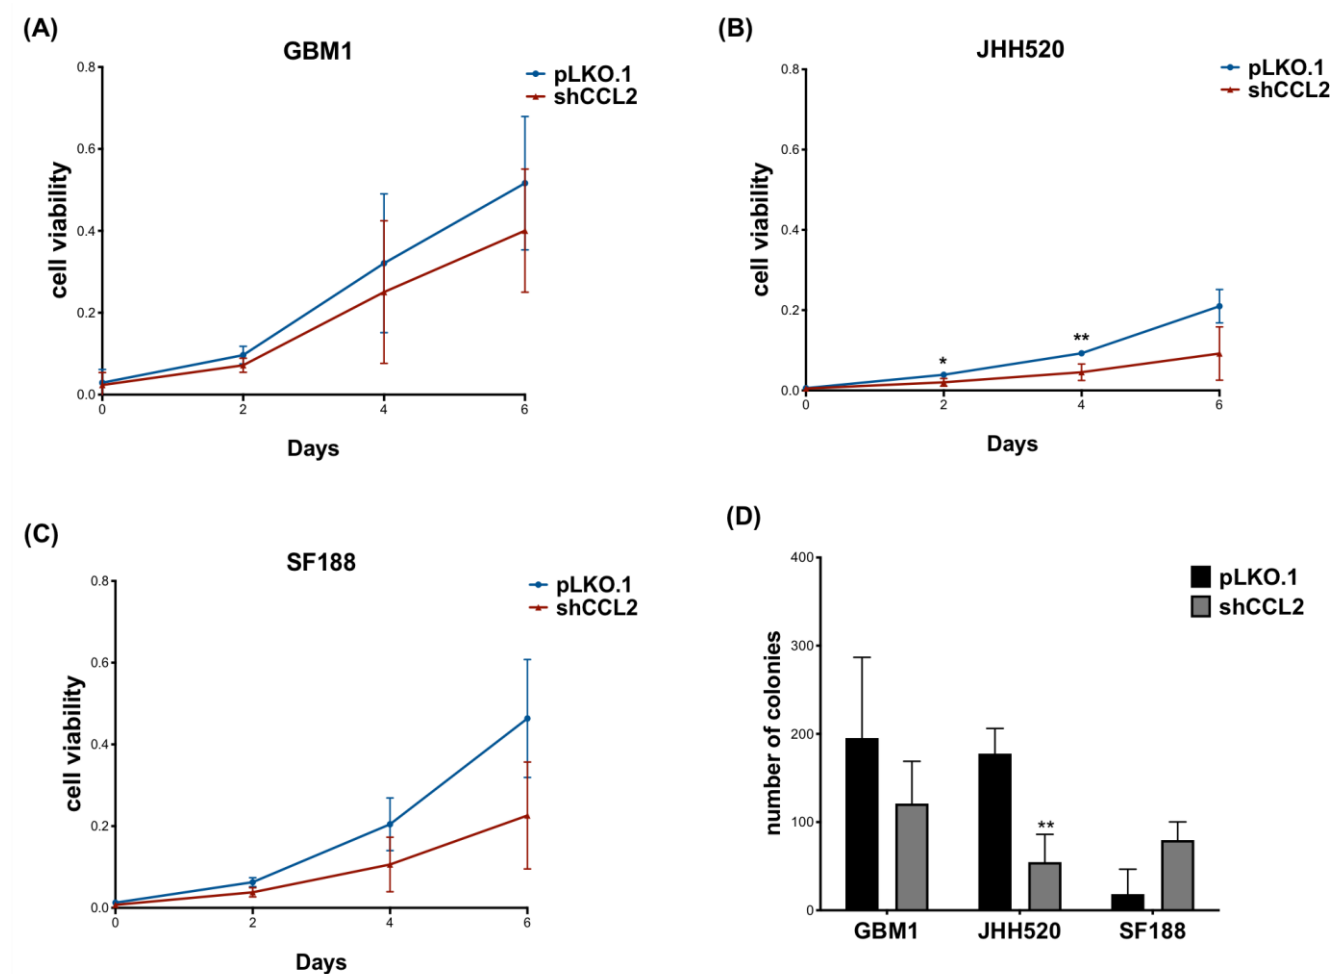

#### Supplementary Figure S4: CCL2 mediated cell viability and clonogenicity of GBM cells:

(A)–(C) Exponential growth curves representing cell viability in cell lines compared to control (pLKO.1) cells measured by MTT assay. (D) CCL2 suppression led to decreased clonogenicity of GBM1 and JHH520 while increasing clonogenicity of SF188 as detected by using a soft agar assay. Quantifications of three colony forming assays are shown. Data are presented as mean  $\pm$  SD (n=3). Statistical significance was calculated with unpaired t-test. \*  $p \leq 0.05$  \*\* $p \leq 0.01$  \*\*\* $p \leq 0.001$ .

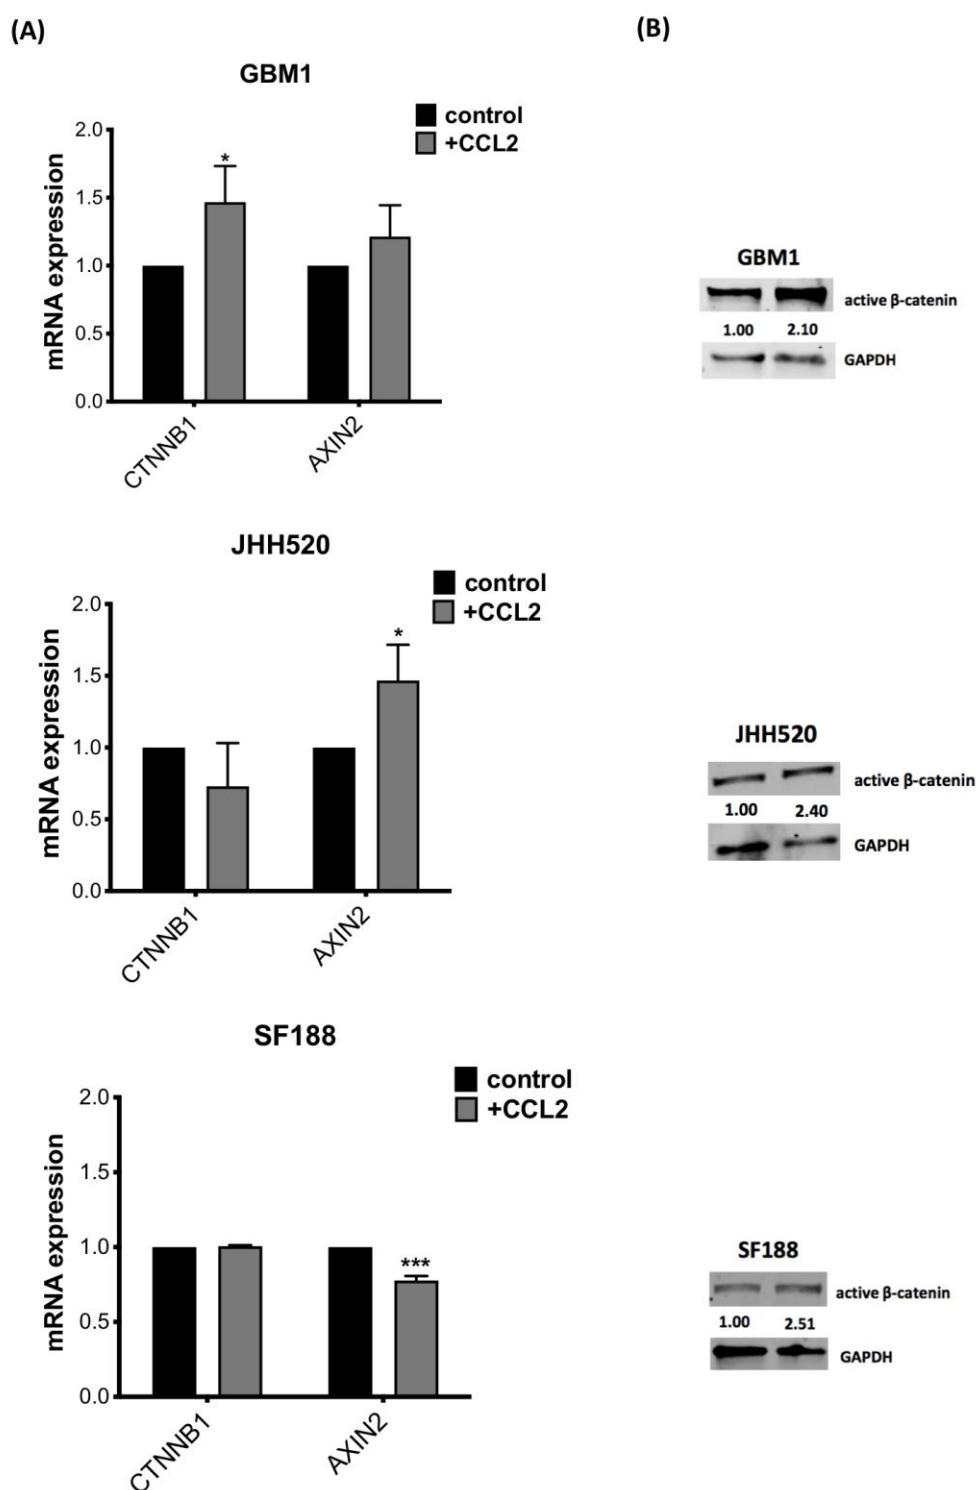

**Supplementary Figure S5: Treatment with recombinant CCL2 alters  $\beta$ -catenin -activity of GBM cells:** (A) The relative mRNA expression levels of  $\beta$ -catenin gene (*CTNNB1*) and target gene *AXIN2* were measured by RT-qPCR in CCL2-treated cells compared to control cells (PBS/BSA 0,1%). Cells were treated with 100 ng/ml recombinant CCL2 for 30 minutes. (B) Non-phospho- (active)  $\beta$ -catenin protein levels were increased after CCL2 treatment as assessed by immunoblotting. Data are presented as mean  $\pm$  SD (n=3). Statistical significance was calculated with unpaired t-test. \*  $p \leq 0.05$  \*\* $p \leq 0.01$  \*\*\* $p \leq 0.001$ .

**Supplementary Table S1: Primer sequences used in RT qPCR**

| Primer         | forward                        | reverse                           |
|----------------|--------------------------------|-----------------------------------|
| <b>β-actin</b> | CCCAGCACAATGAAGATCAA           | CGATCCACACGGAGTACTTG              |
| <b>CTNNB1</b>  | GGGCCTCAGAGAGCTGAGTA           | TGAGCAGCATCAAACGTGTAG             |
| <b>AXIN2</b>   | AGCCAAAGCGATCTACAAAAGG         | GGTAGGCATTTTCCTCCATCAC            |
| <b>c-MYC</b>   | CCTTAATTAAAATGCCCCTCAACGTTAGCT | GGAATTCCATATGTTACGCACAAGAGTTCCGTA |
| <b>SNAI1</b>   | GCTGCAGGACTCTAATCC             | ATCTCCGGAGGTGGGATC                |
| <b>SNAI2</b>   | TGGTTGCTTCAAGGACACAT           | GTTGCAGTGAGGGCAAGAA               |
| <b>ZEB1</b>    | AAGAATTCACAGTGGAG AGAAGCCA     | CGTTTCTTGCAGTTTGGGCATT            |
| <b>SOX2</b>    | TGGACAGTTACGCGCACA             | CGAGTAGGACATGCTGTA                |
| <b>CCL2</b>    | AGGTGACTGGGGCATTGAT            | GCCTCCAGCATGAAAGTCTC              |
